# Supplementary material for: Identification of the Major Expressed S-Layer and Cell Surface-Layer-Related Proteins in the Model Methanogenic Archaea:Methanosarcina barkeriFusaro andMethanosarcina acetivoransC2A
Source: Hindawi journal article supplement (doi:10.1155/2012/873589), 2012-01-01
Supplement: f1 [file 873589.f1.pdf]

## Supplementary Materials

**Figure S1:** Potential RNA secondary structures located in the un-translated region (UTR) of the *M. barkeri* Mba\_A1958 mRNA using RNAfold webserver [16]. Regions of potential base pairing are indicated as are the 5' mRNA start and the 3' end corresponding to the start of translation.

**Table S1:** Oligonucleotides used in this study.

**Table S2:** Proteins identified by LC-MS/MS.

**Table S3:** Mbar\_A1758 peptides detected from analyses of multiple gel bands.

**Table S4:** Microarray transcript abundance of all cell surface and cell surface-related genes annotated in the *M. acetivorans* genome.

**Figure S1:** Potential RNA secondary structures located in the untranslated region (UTR) of the *M. barkeri* Mba\_A1758 mRNA.

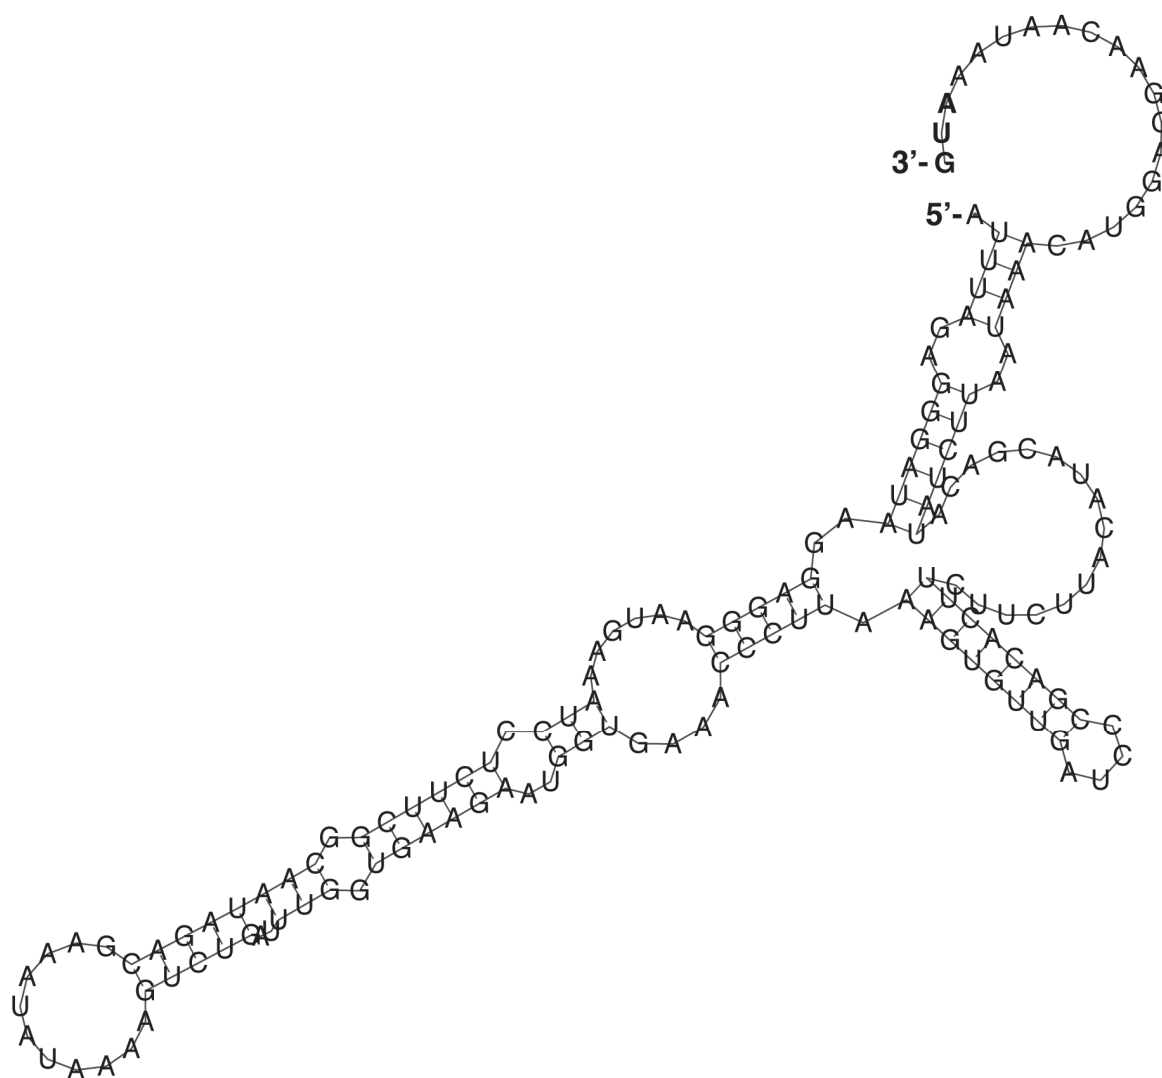

**Table S1: Oligonucleotides used in this study.**

| Primer Name     | Sequence                                  | Primer Name     | Sequence                           |
|-----------------|-------------------------------------------|-----------------|------------------------------------|
| Mbar_A1034RTfor | cactccaagttctgctcaactcca                  | Mbar_A1034RTrev | tggcaggttgatggaagca                |
| Mbar_A1577RTfor | catcctctgctcctcttctcga                    | Mbar_A1577RTrev | aactcctgcaagcacctcga               |
| Mbar_A1758RTfor | gctgacactccaacatccga                      | Mbar_A1758RTrev | cggagtctcgctgctgta                 |
| Mbar_A1775RTfor | tcggtcgattcttctccaga                      | Mbar_A1775RTrev | ccagccgtctcagcattaag               |
| Mbar_A1815RTfor | tcaacctgctggccttgatac                     | Mbar_A1815RTrev | actggttccgattgcca                  |
| Mbar_A1816RTfor | tgccatggagtggataagctt                     | Mbar_A1816RTrev | agtccggagaattcacgctga              |
| Mbar_A2011RTfor | agcttgcagcagcgttgg                        | Mbar_A2011RTrev | ggcaggactataggagataacggt           |
| Mbar_A2016RTfor | ttccgatgattgcggtcc                        | Mbar_A2016RTrev | cattgtgatgcctgagtcgga              |
| Mbar_A3145RTfor | tcgagagcttgcctggcatc                      | Mbar_A3145RTrev | gtgtctctggagttggcgga               |
| MA0068RTfor     | gatgatgaggaggaggacactgt                   | MA0068RTrev     | gccggacatcgatatgact                |
| MA0653RTfor     | cggctacgttattcatcctgca                    | MA0653RTrev     | ttcctctgcgcttctca                  |
| MA0829RTfor     | cggcttcggtgatcaatca                       | MA0829RTrev     | tgcgatggtggtggtgtaa                |
| MA0876RTfor     | Gaatctctggatcggacggt                      | MA0876RTrev     | ggacacggaagtggtgaagg               |
| MA0884RTfor     | Ggctccgaacatcctgca                        | MA0884RTrev     | catctccgccgatagcca                 |
| MA0957RTfor     | Cagaaccggtgtattcgtca                      | MA0957RTrev     | tggataaccgtctcggtgaag              |
| MA3556RTfor     | Tctgctcctcaaccttctgacc                    | MA3556RTrev     | ttgctcctctcggtctctcc               |
| MA3598RTfor     | Gtgcgctgttccgtga                          | MA3598RTrev     | tgcatcgtcaggattgatgg               |
| MA3639RTfor     | Ccatgcatctccggtctacc                      | MA3639RTrev     | tcttcagaggcgacaagatcct             |
| MA4531RTfor     | Tgaacattgctggaagcagg                      | MA4531RTrev     | ggaagcaatggaggatacgtg              |
| MA0830RTfor     | Agccggaataagcacactga                      | MA0830RTrev     | ccttcggagacgttaagaacc              |
| MA3606RTfor     | Caategaaccgcactgg                         | MA3606RTrev     | gtcatcacctgccacctaggaa             |
| MA4546RTfor     | Ggcacatgcaacaccgga                        | MA4546RTrev     | tcgcaaccgagtcacactc                |
| MA3998RTfor     | Caacacggtcgcagatctc                       | MA3998RTrev     | ccaaggtggcggttacaa                 |
| Mbar_A1758prim  | Cggatgcaaatacagtcagaagcatgaga<br>gcagccag | MA08295prim     | Ctgaccacggatctcaattactgctactgcgctt |

**Table S2: Proteins identified by LC-MS/MS.**

| ID number (UniProt)                                             | Comment | ID number (NCBI)            | Protein Description                                                                                              | Mascot Prot Score | MW (Da) | Peptides |
|-----------------------------------------------------------------|---------|-----------------------------|------------------------------------------------------------------------------------------------------------------|-------------------|---------|----------|
| <b>Band 1</b>                                                   |         |                             |                                                                                                                  |                   |         |          |
| P0C0W7_METBF                                                    |         | Mbar_A1502                  | Trimethylamine methyltransferase mttB (EC 2.1.1.-) (TMA methyltransferase).                                      | 1140              | 53625   | 21       |
| Q46BP2_METBF                                                    |         | Mbar_A1758                  | Hypothetical protein.                                                                                            | 1097              | 73491   | 23       |
| P07955_METBF                                                    |         | Mbar_A0897                  | Methyl-coenzyme M reductase subunit beta (EC 2.8.4.1) (Coenzyme-B sulfoethylthiotransferase beta).               | 836               | 45261   | 14       |
| Q46CN6_METBF                                                    |         | Mbar_A1396                  | Pyruvate, phosphate dikinase.                                                                                    | 706               | 96914   | 15       |
| Q464Z4_METBF                                                    |         | Mbar_A3685                  | Protein translation elongation factor 1A.                                                                        | 672               | 46128   | 15       |
| P07962_METBF                                                    |         | Mbar_A0893                  | Methyl-coenzyme M reductase subunit alpha (EC 2.8.4.1) (Coenzyme-B sulfoethylthiotransferase alpha).             | 560               | 61791   | 12       |
| Q46D74_METBF                                                    |         | Mbar_A1201                  | Hsp60.                                                                                                           | 299               | 59181   | 6        |
| Q464Z3_METBF                                                    |         | Mbar_A3686                  | Elongation factor 2 fusA EF2_METBF AAZ72549                                                                      | 299               | 80864   | 6        |
| Q469Z7_METBF                                                    |         | Mbar_A2374                  | Carbamoyl-phosphate synthase large chain.                                                                        | 295               | 118270  | 8        |
| Q46FD0_METBF                                                    |         | Mbar_A0199,<br>Mbar_A0429   | Carbon-monoxide dehydrogenase, subunit gamma.                                                                    | 220               | 51200   | 5        |
| Q46CA1_METBF                                                    |         | Mbar_A1543                  | 60 kDa chaperonin.                                                                                               | 173               | 57890   | 4        |
| Q46FC7_METBF or<br>Q46G06_METBF                                 |         | Mbar_A0432 or<br>Mbar_A0202 | Carbon-monoxide dehydrogenase, subunit beta.                                                                     | 169               | 52718   | 4        |
| Q465G4_METBF                                                    |         | Mbar_A3613                  | Isoleucyl-tRNA synthetase..                                                                                      | 169               | 120433  | 3        |
| Q46DJ0_METBF                                                    |         | Mbar_A1084                  | Hsp60.                                                                                                           | 160               | 58194   | 4        |
| Q46FV4_METBF                                                    |         | Mbar_A0254                  | F420-dependent N5,N10-methylene-tetrahydromethanopterin reductase.                                               | 150               | 34570   | 2        |
| Q46EW5_METBF                                                    |         | Mbar_A0597                  | Phosphomethylpyrimidine synthase 1 thiC1 AAZ69577                                                                | 133               | 46586   | 3        |
| Q46FH4_METBF                                                    |         | Mbar_A0385                  | H(+)-transporting ATP synthase, subunit B.                                                                       | 108               | 50308   | 2        |
| Q46E72_METBF,<br>Q1DGD7_METBF,<br>Q46E73_METBF,<br>P0C0W3_METBF |         | Mbar_A0843 or<br>Mbar_A0846 | Monomethylamine methyltransferase mtmB1 (EC 2.1.1.-) (MMA methyltransferase 1) (MMAMT 1)..<br>MTMB1_METBF=Q46E72 | 80                | 49945   | 2        |
| <b>Band 2</b>                                                   |         |                             |                                                                                                                  |                   |         |          |
| Q46BP2_METBF                                                    |         | Mbar_A1758                  | Hypothetical protein.                                                                                            | 966               | 73491   | 17       |
| P0C0W7_METBF                                                    |         | Mbar_A1502                  | Trimethylamine methyltransferase mttB (EC 2.1.1.-) (TMA methyltransferase).                                      | 899               | 53625   | 16       |
| Q46CN6_METBF                                                    |         | Mbar_A1396                  | Pyruvate, phosphate dikinase.                                                                                    | 757               | 96914   | 15       |
| Q464Z4_METBF                                                    |         | Mbar_A3685                  | Protein translation elongation factor 1A.                                                                        | 605               | 46128   | 14       |
| P07955_METBF                                                    |         | Mbar_A0897                  | Methyl-coenzyme M reductase subunit beta (EC 2.8.4.1)                                                            | 593               | 45261   | 11       |

| ID number (UniProt)                                                             | Comment | ID number (NCBI)            | Protein Description                                                                                                 | Mascot Prot Score | MW (Da) | Peptides |
|---------------------------------------------------------------------------------|---------|-----------------------------|---------------------------------------------------------------------------------------------------------------------|-------------------|---------|----------|
| P07962_METBF                                                                    |         | Mbar_A0893                  | (Coenzyme-B sulfoethylthiotransferase beta).<br>Methyl-coenzyme M reductase subunit alpha (EC 2.8.4.1)              | 492               | 61791   | 12       |
| Q469Z7_METBF                                                                    |         | Mbar_A2374                  | (Coenzyme-B sulfoethylthiotransferase alpha).<br>Carbamoyl-phosphate synthase large chain.                          | 369               | 118270  | 9        |
| Q46G04_METBF                                                                    |         | Mbar_A0204                  | Carbon-monoxide dehydrogenase, subunit alpha.                                                                       | 256               | 88717   | 6        |
| Q464Y7_METBF                                                                    |         | Mbar_A3692                  | DNA-directed RNA polymerase, subunit A.                                                                             | 253               | 98377   | 9        |
| Q465G4_METBF                                                                    |         | Mbar_A3613                  | Isoleucyl-tRNA synthetase..                                                                                         | 216               | 120433  | 5        |
| Q464Z3_METBF                                                                    |         | Mbar_A3686                  | Elongation factor 2 fusA EF2_METBF AAZ72549                                                                         | 197               | 80864   | 5        |
| Q46AW0_METBF                                                                    |         | Mbar_A2048                  | Leucyl-tRNA synthetase.                                                                                             | 195               | 111025  | 6        |
| Q46FC7_METBF or                                                                 |         | Mbar_A0432 or               | Carbon-monoxide dehydrogenase, subunit beta.                                                                        | 193               | 52718   | 5        |
| Q46G06_METBF                                                                    |         | Mbar_A0202                  |                                                                                                                     |                   |         |          |
| Q465I5_METBF                                                                    |         | Mbar_A3589                  | Superoxide dismutase (Fe) (EC 1.15.1.1)..                                                                           | 182               | 23931   | 5        |
| Q46AV5_METBF                                                                    |         | Mbar_A2053                  | Membrane alanine aminopeptidase.                                                                                    | 181               | 109644  | 5        |
| Q46FD0_METBF                                                                    |         | Mbar_A0199,<br>Mbar_A0429   | Carbon-monoxide dehydrogenase, subunit gamma.                                                                       | 156               | 51200   | 4        |
| Q46CA1_METBF                                                                    |         | Mbar_A1543                  | 60 kDa chaperonin.                                                                                                  | 156               | 57890   | 3        |
| Q46D74_METBF                                                                    |         | Mbar_A1201                  | Hsp60.                                                                                                              | 153               | 59181   | 3        |
| Q465Y6_METBF                                                                    |         | Mbar_A3433                  | Heat shock 70 kDa protein; HSP70, chaperone dnaK_METBF<br>AAZ72306:                                                 | 135               | 66362   | 2        |
| Q46C68_METBF                                                                    |         | Mbar_A1577                  | Hypothetical protein.                                                                                               | 132               | 82328   | 3        |
| Q46E72_METBF,<br>Q1DGD7_METBF,<br>Q46E73_METBF,<br>P0C0W3_METBF<br>Q46EW5_METBF |         | Mbar_A0843 or<br>Mbar_A0846 | Monomethylamine methyltransferase mtmB1 (EC 2.1.1.-)<br>(MMA methyltransferase 1) (MMAMT 1)..<br>MTMB1_METBF=Q46E72 | 113               | 49945   | 4        |
|                                                                                 |         | Mbar_A0597                  | Phosphomethylpyrimidine synthase 1 thiC1 AAZ69577                                                                   | 98                | 46586   | 2        |
| <b>Band 3</b>                                                                   |         |                             |                                                                                                                     |                   |         |          |
| Q46CN6_METBF                                                                    |         | Mbar_A1396                  | Pyruvate, phosphate dikinase.                                                                                       | 1498              | 96914   | 30       |
| P0C0W7_METBF                                                                    |         | Mbar_A1502                  | Trimethylamine methyltransferase mttB (EC 2.1.1.-) (TMA<br>methyltransferase).                                      | 930               | 53625   | 17       |
| Q464Y7_METBF                                                                    |         | Mbar_A3692                  | DNA-directed RNA polymerase, subunit A.                                                                             | 890               | 98377   | 22       |
| Q46BP2_METBF                                                                    |         | Mbar_A1758                  | Hypothetical protein.                                                                                               | 667               | 73491   | 12       |
| Q464Z4_METBF                                                                    |         | Mbar_A3685                  | Protein translation elongation factor 1A.                                                                           | 524               | 46128   | 12       |
| P07962_METBF                                                                    |         | Mbar_A0893                  | Methyl-coenzyme M reductase subunit alpha (EC 2.8.4.1)<br>(Coenzyme-B sulfoethylthiotransferase alpha).             | 476               | 61791   | 10       |
| P07955_METBF                                                                    |         | Mbar_A0897                  | Methyl-coenzyme M reductase subunit beta (EC 2.8.4.1)<br>(Coenzyme-B sulfoethylthiotransferase beta).               | 452               | 45261   | 8        |

| ID number (UniProt) | Comment                                                                                      | ID number (NCBI)          | Protein Description                                                                                             | Mascot Prot Score | MW (Da) | Peptides |
|---------------------|----------------------------------------------------------------------------------------------|---------------------------|-----------------------------------------------------------------------------------------------------------------|-------------------|---------|----------|
| Q464Z3_METBF        |                                                                                              | Mbar_A3686                | Elongation factor 2 fusA EF2_METBF AAZ72549                                                                     | 402               | 80864   | 10       |
| Q46FD0_METBF        |                                                                                              | Mbar_A0199,<br>Mbar_A0429 | Carbon-monoxide dehydrogenase, subunit gamma.                                                                   | 304               | 51200   | 6        |
| Q46CS0_METBF        |                                                                                              | Mbar_A1361                | Alanyl-tRNA synthetase.                                                                                         | 265               | 103076  | 8        |
| Q46G04_METBF        |                                                                                              | Mbar_A0204                | Carbon-monoxide dehydrogenase, subunit alpha.                                                                   | 244               | 88717   | 6        |
| Q465Y6_METBF        |                                                                                              | Mbar_A3433                | Heat shock 70 kDa protein; HSP70, chaperone dnaK_METBF AAZ72306:                                                | 187               | 66362   | 3        |
| Q46CA1_METBF        |                                                                                              | Mbar_A1543                | 60 kDa chaperonin.                                                                                              | 162               | 57890   | 3        |
| Q46FC7_METBF or     |                                                                                              | Mbar_A0432 or             | Carbon-monoxide dehydrogenase, subunit beta.                                                                    | 148               | 52718   | 4        |
| Q46G06_METBF        |                                                                                              | Mbar_A0202                |                                                                                                                 |                   |         |          |
| Q46B32_METBF        |                                                                                              | Mbar_A1976                | Valyl-tRNA synthetase valS SYV_METBF AAZ70910                                                                   | 129               | 98910   | 4        |
| Q46D74_METBF        |                                                                                              | Mbar_A1201                | Hsp60.                                                                                                          | 122               | 59181   | 4        |
| Q46FV4_METBF        |                                                                                              | Mbar_A0254                | F420-dependent N5,N10-methylene-tetrahydromethanopterin reductase.                                              | 118               | 34570   | 3        |
| Q46FH3_METBF        |                                                                                              | Mbar_A0386                | A1AO H+ ATPase subunit A.                                                                                       | 91                | 63600   | 2        |
| P07964_METBF        |                                                                                              | Mbar_A0894                | Methyl-coenzyme M reductase subunit gamma (EC 2.8.4.1) (Coenzyme-B sulfoethylthiotransferase gamma) MCRG_METBF. | 89                | 27663   | 3        |
| Q46EK0_METBF        |                                                                                              | Mbar_A0714                | Aconitate hydratase.                                                                                            | 71                | 102838  | 2        |
| <b>Band 4</b>       |                                                                                              |                           |                                                                                                                 |                   |         |          |
| P0C0W7_METBF        |                                                                                              | Mbar_A1502                | Trimethylamine methyltransferase mttB (EC 2.1.1.-) (TMA methyltransferase).                                     | 1171              | 53625   | 34       |
| Q46A14_METBF        |                                                                                              | Mbar_A2180                | Glutamate-ammonia ligase.                                                                                       | 829               | 57085   | 17       |
| Q46FD0_METBF        |                                                                                              | Mbar_A0199,<br>Mbar_A0429 | Carbon-monoxide dehydrogenase, subunit gamma.                                                                   | 592               | 51200   | 11       |
| Q46G06_METBF        | Peptide 340-349 (FIQSDGGWNR) was unique to Q46G06_METBF. It differentiated from Q46FC7_METBF | Mbar_A202                 | Carbon-monoxide dehydrogenase, subunit beta.                                                                    | 561               | 52614   | 13       |
| Q464Z4_METBF        |                                                                                              | Mbar_A3685                | Protein translation elongation factor 1A.                                                                       | 462               | 46128   | 11       |
| P07955_METBF        |                                                                                              | Mbar_A0897                | Methyl-coenzyme M reductase subunit beta (EC 2.8.4.1) (Coenzyme-B sulfoethylthiotransferase beta).              | 427               | 45261   | 8        |
| Q46DX8_METBF        |                                                                                              | Mbar_A0942                | 2-isopropylmalate synthase.                                                                                     | 363               | 54208   | 7        |
| Q46E72_METBF,       |                                                                                              | Mbar_A0843 or             | Monomethylamine methyltransferase mtmB1 (EC 2.1.1.-)                                                            | 256               | 49945   | 7        |

| ID number (UniProt)                                             | Comment | ID number (NCBI)            | Protein Description                                                                                              | Mascot Prot Score | MW (Da) | Peptides |
|-----------------------------------------------------------------|---------|-----------------------------|------------------------------------------------------------------------------------------------------------------|-------------------|---------|----------|
| Q1DGD7_METBF,<br>Q46E73_METBF,<br>P0C0W3_METBF<br>P0C0W5_METBF  |         | Mbar_A0846                  | (MMA methyltransferase 1) (MMAMT 1)..<br>MTMB1_METBF=Q46E72                                                      |                   |         |          |
|                                                                 |         | Mbar_A1506                  | Dimethylamine methyltransferase mtbB1 (EC 2.1.1.-) (DMA methyltransferase 1) (DMAMT 1).                          | 241               | 50169   | 7        |
| P07964_METBF                                                    |         | Mbar_A0894                  | Methyl-coenzyme M reductase subunit gamma (EC 2.8.4.1) (Coenzyme-B sulfoethylthiotransferase gamma) MCRG_METBF.  | 237               | 27663   | 5        |
| Q46BP1_METBF                                                    |         | Mbar_A1759                  | Hypothetical protein.                                                                                            | 236               | 26745   | 4        |
| Q46FY1_METBF                                                    |         | Mbar_A0227                  | Glutamate synthase (NADPH).                                                                                      | 230               | 50623   | 7        |
| Q46EW5_METBF                                                    |         | Mbar_A0597                  | Phosphomethylpyrimidine synthase 1 thiC1 AAZ69577                                                                | 162               | 46586   | 3        |
| Q46E2_METBF                                                     |         | Mbar_A2850                  | Enolase (EC 4.2.1.11) (2-phospho-D-glycerate hydro-lyase).                                                       | 139               | 46410   | 3        |
| Q46FH4_METBF                                                    |         | Mbar_A0385                  | H(+)-transporting ATP synthase, subunit B.                                                                       | 134               | 50308   | 2        |
| Q46W7_METBF                                                     |         | Mbar_A3191                  | Cobyric acid synthase.                                                                                           | 128               | 53269   | 3        |
| Q46CK2_METBF                                                    |         | Mbar_A1431                  | D-3-phosphoglycerate dehydrogenase.                                                                              | 118               | 55761   | 3        |
| Q46X0_METBF                                                     |         | Mbar_A3188                  | Putative thymidine phosphorylase TYPH_METBF AAZ72072                                                             | 112               | 54594   | 3        |
| P07962_METBF                                                    |         | Mbar_A0893                  | Methyl-coenzyme M reductase subunit alpha (EC 2.8.4.1) (Coenzyme-B sulfoethylthiotransferase alpha).             | 103               | 61791   | 2        |
| Q46DL0_METBF                                                    |         | Mbar_A1064                  | Methanol:corrinoid methyltransferase.                                                                            | 83                | 50303   | 2        |
| <b>Band 5</b>                                                   |         |                             |                                                                                                                  |                   |         |          |
| P07955_METBF                                                    |         | Mbar_A0897                  | Methyl-coenzyme M reductase subunit beta (EC 2.8.4.1) (Coenzyme-B sulfoethylthiotransferase beta).               | 911               | 45261   | 15       |
| Q464Z4_METBF                                                    |         | Mbar_A3685                  | Protein translation elongation factor 1A.                                                                        | 875               | 46128   | 19       |
| P0C0W5_METBF                                                    |         | Mbar_A1506                  | Dimethylamine methyltransferase mtbB1 (EC 2.1.1.-) (DMA methyltransferase 1) (DMAMT 1).                          | 762               | 50169   | 21       |
| Q465E0_METBF                                                    |         | Mbar_A3638                  | Methanol-5-hydroxybenzimidazolylcobamide co-methyltransferase, isozyme 3.                                        | 751               | 50247   | 15       |
| Q46E2_METBF                                                     |         | Mbar_A2850                  | Enolase (EC 4.2.1.11) (2-phospho-D-glycerate hydro-lyase).                                                       | 740               | 46410   | 14       |
| Q46FH4_METBF                                                    |         | Mbar_A0385                  | H(+)-transporting ATP synthase, subunit B.                                                                       | 598               | 50308   | 9        |
| Q46E72_METBF,<br>Q1DGD7_METBF,<br>Q46E73_METBF,<br>P0C0W3_METBF |         | Mbar_A0843 or<br>Mbar_A0846 | Monomethylamine methyltransferase mtmB1 (EC 2.1.1.-) (MMA methyltransferase 1) (MMAMT 1)..<br>MTMB1_METBF=Q46E72 | 585               | 49945   | 14       |
| Q46EW5_METBF                                                    |         | Mbar_A0597                  | Phosphomethylpyrimidine synthase 1 thiC1 AAZ69577                                                                | 582               | 46586   | 11       |
| Q46FD0_METBF                                                    |         | Mbar_A0199,<br>Mbar_A0429   | Carbon-monoxide dehydrogenase, subunit gamma.                                                                    | 566               | 51200   | 11       |

| ID number (UniProt)             | Comment | ID number (NCBI)            | Protein Description                                                                                                           | Mascot Prot Score | MW (Da) | Peptides |
|---------------------------------|---------|-----------------------------|-------------------------------------------------------------------------------------------------------------------------------|-------------------|---------|----------|
| P0C0W7_METBF                    |         | Mbar_A1502                  | Trimethylamine methyltransferase mttB (EC 2.1.1.-) (TMA methyltransferase).                                                   | 461               | 53625   | 9        |
| Q46FF6_METBF                    |         | Mbar_A0403                  | Adenylosuccinate synthetase purA AAZ69386                                                                                     | 310               | 46646   | 8        |
| Q46DL0_METBF                    |         | Mbar_A1064                  | Methanol:corrinoide methyltransferase.                                                                                        | 271               | 50303   | 7        |
| Q46CY7_METBF                    |         | Mbar_A1292                  | Molybdenum formylmethanofuran dehydrogenase subunit.                                                                          | 265               | 47519   | 6        |
| Q468C0_METBF                    |         | Mbar_A2872                  | Coenzyme F390 synthetase/phenylacetyl-CoA ligase.                                                                             | 198               | 48998   | 4        |
| P07964_METBF                    |         | Mbar_A0894                  | Methyl-coenzyme M reductase subunit gamma (EC 2.8.4.1) (Coenzyme-B sulfoethylthiotransferase gamma) MCRG_METBF.               | 170               | 27663   | 4        |
| Q46BD3_METBF or<br>Q46BD4_METBF |         | Mbar_A1869 or<br>Mbar_A1868 | Iron(III) dicitrate-binding protein.                                                                                          | 166               | 43383   | 4        |
| Q464Y8_METBF                    |         | Mbar_A3691                  | DNA-directed RNA polymerase, subunit A.                                                                                       | 158               | 46698   | 3        |
| Q46CD5_METBF                    |         | Mbar_A1503                  | Dimethylamine corrinoide protein.                                                                                             | 129               | 23068   | 2        |
| Q465P3_METBF                    |         | Mbar_A3530                  | PmbA/TldD family protein.                                                                                                     | 117               | 46101   | 3        |
| Q46FC9_METBF or<br>Q46GO8_METBF |         | Mbar_A0430 or<br>Mbar_A0200 | CO dehydrogenase/acetyl-COA synthase delta subunit.                                                                           | 109               | 47267   | 3        |
| Q466Y5_METBF                    |         | Mbar_A3173                  | Aspartyl-tRNA synthetase aspS AAZ72057                                                                                        | 107               | 50764   | 2        |
| <b>Band 6</b>                   |         |                             |                                                                                                                               |                   |         |          |
| Q46FY8_METBF                    |         | Mbar_A0220                  | Ketol-acid reductoisomerase; ILVC_METBF AAZ69204                                                                              | 496               | 36971   | 12       |
| Q465J3_METBF                    |         | Mbar_A3581                  | Putative pyridoxine biosynthesis protein.                                                                                     | 458               | 31895   | 10       |
| Q46DI1_METBF                    |         | Mbar_A1093                  | Phosphoserine phosphatase.                                                                                                    | 404               | 32860   | 9        |
| Q48941_METBA                    |         | Mbar_A1288                  | molybdenum formylmethanofuran dehydrogenase chain F; S62197- fmdF                                                             | 388               | 37226   | 10       |
| Q46BM3_METBF                    |         | Mbar_A1778                  | Phosphate-binding protein.                                                                                                    | 388               | 31499   | 8        |
| Q46FV4_METBF                    |         | Mbar_A0254                  | F420-dependent N5,N10-methylene-tetrahydromethanopterin reductase.                                                            | 353               | 34570   | 9        |
| P94919_METBF                    |         | Mbar_A2233                  | N(5),N(10)-methenyltetrahydromethanopterin cyclohydrolase, MCH_METBF, AAZ71158,                                               | 336               | 34881   | 7        |
| Q46BI0_METBF                    |         | Mbar_A1821                  | Phosphate acetyltransferase.                                                                                                  | 334               | 35326   | 5        |
| O93716_METBF                    |         | Mbar_A1255                  | MTRH_METBF, AAZ70218, Tetrahydromethanopterin S-methyltransferase subunit H, Methanosarcina barkeri (strain Fusaro / DSM 804) | 324               | 34234   | 8        |
| Q48949_METBA                    |         | Mbar_A1054                  | mtaA methylcobalamin-coenzyme M methyltransferase isozyme I s62368                                                            | 317               | 35849   | 6        |
| P07964_METBF                    |         | Mbar_A0894                  | MCRG Methyl-coenzyme M reductase subunit gamma (EC 2.8.4.1) (Coenzyme-B sulfoethylthiotransferase gamma).                     | 305               | 27663   | 7        |



| <b>ID number<br/>(UniProt)</b>                                  | <b>Comment</b> | <b>ID number<br/>(NCBI)</b> | <b>Protein Description</b>                                                                                                                              | <b>Mascot<br/>Prot<br/>Score</b> | <b>MW<br/>(Da)</b> | <b>Peptides</b> |
|-----------------------------------------------------------------|----------------|-----------------------------|---------------------------------------------------------------------------------------------------------------------------------------------------------|----------------------------------|--------------------|-----------------|
| Q46CL6_METBF                                                    |                | Mbar_A1417                  | Dimethylallyltranstransferase / geranyltranstransferase.                                                                                                | 299                              | 35366              | 5               |
| Q46D91_METBF                                                    |                | Mbar_A1183                  | GTP cyclohydrolase mptA Methanosarcina barkeri (strain Fusaro / DSM 804).                                                                               | 251                              | 35716              | 5               |
| Q46E75_METBF                                                    |                | Mbar_A0841                  | Methylcobamide:CoM methyltransferase mtbA (EC 2.1.1.-) (Methylcobamide:CoM methyltransferase II isozyme A) (MT2-A).. MTBA_METBA; S62369, O30640, Q48928 | 245                              | 36510              | 5               |
| Q48943_METBF                                                    |                | Mbar_A1290                  | formylmethanofuran dehydrogenase (EC 1.2.99.5) (molybdenum) chain C ; s62199; FMDC_METBF                                                                | 209                              | 31531              | 4               |
| Q465R0_METBF                                                    |                | Mbar_A3512                  | Ornithine carbamoyltransferase.                                                                                                                         | 193                              | 33792              | 5               |
| Q46BF4_METBF                                                    |                | Mbar_A1847                  | F420-nonreducing hydrogenase I.                                                                                                                         | 174                              | 41354              | 4               |
| P55301_METBF                                                    |                | Mbar_A0980                  | H4MPT formyltransferase AAZ69952                                                                                                                        | 159                              | 31677              | 4               |
| Q466U0_METBF                                                    |                | Mbar_A3220                  | Phage shock protein A.                                                                                                                                  | 151                              | 28109              | 4               |
| Q46F30_METBF                                                    |                | Mbar_A0531                  | Phosphoribosylaminoimidazole-succinocarboxamide synthase.                                                                                               | 122                              | 27157              | 3               |
| Q46D96_METBF                                                    |                | Mbar_A1178                  | GMP synthase (Glutamine-hydrolyzing).                                                                                                                   | 117                              | 34072              | 3               |
| Q465Y2_METBF                                                    |                | Mbar_A3437                  | Hypothetical protein.                                                                                                                                   | 101                              | 35933              | 2               |
| Q46GC8_METBF                                                    |                | Mbar_A0077                  | 30S Ribosomal protein S4P AAZ69064                                                                                                                      | 99                               | 24348              | 2               |
| Q46DH9_METBF                                                    |                | Mbar_A1095                  | Methylenetetrahydromethanopterin dehydrogenase.                                                                                                         | 95                               | 29802              | 2               |
| Q46ET9_METBF                                                    |                | Mbar_A0623                  | Isocitrate/isopropylmalate dehydrogenase family protein.                                                                                                | 94                               | 37134              | 2               |
| Q464Z4_METBF                                                    |                | Mbar_A3685                  | Protein translation elongation factor 1A.                                                                                                               | 94                               | 46128              | 3               |
| Q46G31_METBF                                                    |                | Mbar_A0176                  | Fructose-bisphosphate aldolase.                                                                                                                         | 74                               | 33668              | 2               |
| Q46D53_METBF                                                    |                | Mbar_A1222                  | Hypothetical protein.                                                                                                                                   | 71                               | 34314              | 2               |
| Q46E72_METBF,<br>Q1DGD7_METBF,<br>Q46E73_METBF,<br>P0C0W3_METBF |                | Mbar_A0843 or<br>Mbar_A0846 | Monomethylamine methyltransferase mtmB1 (EC 2.1.1.-) (MMA methyltransferase 1) (MMAMT 1).. MTMB1_METBF=Q46E72                                           | 60                               | 49965              | 2               |

**Table S3: Mbar\_A1758 peptides detected from analyses of multiple gel bands.**

| Peptides | Sequence                  |
|----------|---------------------------|
| 25-31    | A.ADSVEIR.G               |
| 75-94    | K.DVSGNSGNGVIGEGGIVYSTK.I |
| 136-147  | K.LVIDSDDKITLR.T          |
| 148-163  | R.TGETLDIGQGYTLQAK.Q      |
| 164-171  | K.QVDVDGEK.V              |
| 164-171  | K.pyro-QVDVDGEK.V         |
| 164-178  | K.QVDVDGEKVVWLEFDR.D      |
| 172-178  | K.VWLEFDR.D               |
| 277-289  | R.DSTNELAEGLSFK.V         |
| 290-299  | K.VADTSSNVL.R.F           |
| 305-315  | K.EFTDPGTYEVR.G           |
| 420-435  | R.TGETFDLGEYSIQAK.Q       |
| 444-450  | K.VWLEFDK.D               |
| 488-495  | K.VHVNQVFR.G              |
| 539-549  | K.ISNEDTFTLTR.D           |
| 550-562  | R.DSDEDIGEGMYFK.V         |
| 550-562  | R.DSDEDIGEGMoxYFK.V       |
| 563-572  | K.VADTPTSEL.R.Y           |
| 573-579  | R.YYPAIER.I               |

**Table S4:** Microarray transcript abundance of all cell surface and cell surface-related genes annotated in the *M. acetivorans* genome.

| Name <sup>a</sup> | Annotated Function <sup>a</sup>             | Proteomic data <sup>b</sup> | Average count <sup>c</sup> |         | Transmembrane domains <sup>d</sup> |
|-------------------|---------------------------------------------|-----------------------------|----------------------------|---------|------------------------------------|
|                   |                                             |                             | Methanol                   | Acetate |                                    |
| MA0336            | cell surface protein                        | Y                           | 1866.2                     | 155.2   | 2                                  |
| MA0488            | cell surface protein                        | N                           | 152.1                      | 1.1     | 0                                  |
| MA0509            | surface antigen gene                        | N                           | NA                         | NA      | 1                                  |
| MA0512            | surface antigen gene                        | N                           | NA                         | NA      | 2                                  |
| MA0588            | cell surface protein                        | Y                           | 413.1                      | 339.4   | 1                                  |
| MA0850            | cell surface protein                        | N                           | 417.4                      | 130.2   | 1                                  |
| MA0851            | cell surface protein                        | N                           | 313.3                      | 70      | 1                                  |
| MA1286            | cell surface glycoprotein (S-layer protein) | N                           | 75.9                       | 26.6    | 3                                  |
| MA1292            | cell surface protein                        | N                           | 744.9                      | 191.3   | 1                                  |
| MA1293            | cell surface protein                        | N                           | 161.7                      | 32.4    | 0                                  |
| MA1420            | cell surface protein                        | Y                           | 497.7                      | 338     | 1                                  |
| MA1454            | cell surface lipoprotein                    | Y                           | 441.2                      | 44.1    | 1                                  |
| MA1508            | cell surface protein                        | N                           | 237.1                      | 145.8   | 1                                  |
| MA1517            | cell surface protein                        | N                           | 447.9                      | 162.8   | 0                                  |
| MA1590            | surface antigen gene                        | N                           | 414.7                      | 116.4   | 1                                  |
| MA1591            | surface antigen gene                        | N                           | NA                         | NA      | 1                                  |
| MA1717            | cell surface protein                        | N                           | 612.8                      | 155.2   | 2                                  |
| MA1730            | cell surface protein                        | N                           | 157.8                      | 137.5   | 1                                  |
| MA1738            | cell surface protein                        | N                           | 650                        | 347.1   | 1                                  |
| MA1749            | cell surface glycoprotein                   | N                           | 31.9                       | 3.9     | 1                                  |
| MA1751            | cell surface glycoprotein                   | N                           | 618.4                      | 473.1   | 1                                  |
| MA1753            | cell surface protein                        | N                           | 350.4                      | 508.3   | 1                                  |
| MA1754            | cell surface protein                        | N                           | 389.7                      | 906.3   | 0                                  |
| MA1756            | cell surface protein                        | N                           | 558.2                      | 1219.6  | 0                                  |
| MA1761            | surface antigen gene                        | Y                           | NA                         | NA      | 1                                  |
| MA1762            | cell surface protein                        | Y                           | NA                         | NA      | 1                                  |
| MA1764            | cell surface protein                        | Y                           | 534.7                      | 1959.7  | 1                                  |
| MA1766            | cell surface protein                        | Y                           | 94.7                       | 1748.6  | 2                                  |
| MA1767            | cell surface protein                        | N                           | NA                         | NA      | 1                                  |
| MA1838            | cell surface protein                        | N                           | 281.5                      | 135     | 1                                  |
| MA1961            | cell surface glycoprotein (S-layer protein) | N                           | 49.5                       | 12.9    | 1                                  |
| MA2017            | cell surface protein                        | N                           | 178                        | 154.2   | 0                                  |
| MA2019            | pneumococcal surface protein                | Y                           | 338.9                      | 215.9   | 0                                  |
| MA2284            | cell surface protein                        | N                           | 242.1                      | 174.9   | 1                                  |
| MA2335            | cell surface protein                        | N                           | 269.7                      | 80.1    | 0                                  |
| MA2457            | cell surface glycoprotein (S-layer protein) | N                           | 45.6                       | 23.2    | 1                                  |
| MA2507            | cell surface protein                        | N                           | 66.1                       | 51.7    | 0                                  |
| MA2706            | cell surface protein                        | N                           | 253.5                      | 51.8    | 1                                  |
| MA2707            | cell surface protein                        | N                           | NA                         | NA      | 0                                  |
| MA2793            | cell surface protein                        | N                           | 385.7                      | 235.6   | 1                                  |
| MA2885            | cell surface protein                        | N                           | 531.4                      | 212.8   | 1                                  |
| MA2886            | cell surface protein                        | N                           | 1073.8                     | 673.4   | 0                                  |

| Name <sup>a</sup> | Annotated Function <sup>a</sup> | Proteomic data <sup>b</sup> | Average count <sup>c</sup> |         | Transmembrane domains <sup>d</sup> |
|-------------------|---------------------------------|-----------------------------|----------------------------|---------|------------------------------------|
|                   |                                 |                             | Methanol                   | Acetate |                                    |
| MA2916            | cell surface protein            | N                           | 13                         | 14.6    | 2                                  |
| MA2926            | cell surface protein            | N                           | 275.1                      | 48.4    | 1                                  |
| MA2979            | cell surface protein            | N                           | 222.1                      | 121.2   | 3                                  |
| MA3101            | cell surface protein            | N                           | 204.6                      | 135.2   | 2                                  |
| MA3118            | surface antigen gene            | Y                           | NA                         | NA      | 1                                  |
| MA3120            | surface antigen gene            | N                           | NA                         | NA      | 1                                  |
| MA3122            | surface antigen gene            | N                           | NA                         | NA      | 1                                  |
| MA3133            | cell surface protein            | Y                           | 745                        | 884.7   | 2                                  |
| MA3229            | cell surface protein            | N                           | 30.2                       | -18.6   | 4                                  |
| MA3430            | cell surface protein            | N                           | 173.9                      | 76.3    | 1                                  |
| MA3664            | cell surface protein            | N                           | 2206.5                     | 404.5   | 2                                  |
| MA3698            | cell surface protein            | N                           | 123                        | 19.5    | 0                                  |
| MA3699            | cell surface protein            | N                           | 561.2                      | 315.1   | 1                                  |
| MA3700            | cell surface protein            | N                           | 1369.2                     | 490     | 1                                  |
| MA3703            | cell surface glycoprotein       | N                           | 766.7                      | 185.4   | 1                                  |
| MA3782            | cell surface protein            | N                           | 383                        | 126.6   | 2                                  |
| MA3842            | cell surface protein            | Y                           | 130.9                      | 43.5    | 2                                  |
| MA4033            | surface antigen gene            | N                           | 616.5                      | 556     | 1                                  |
| MA4222            | cell surface protein            | N                           | 322.7                      | 203.3   | 1                                  |
| MA4284            | cell surface protein            | N                           | NA                         | NA      | 0                                  |
| MA4285            | cell surface protein            | N                           | 181.7                      | 115.8   | 0                                  |
| MA4287            | cell surface protein            | N                           | 2538.2                     | 839.6   | 1                                  |
| MA4289            | cell surface protein            | N                           | 297                        | 144     | 0                                  |
| MA4291            | cell surface protein            | N                           | 341.8                      | 509.9   | 1                                  |
| MA4292            | cell surface protein            | N                           | 567                        | 502.7   | 0                                  |
| MA4297            | cell surface protein            | N                           | 306.6                      | 169.7   | 0                                  |
| MA4299            | cell surface protein            | N                           | NA                         | NA      | 1                                  |
| MA4301            | cell surface protein            | N                           | 858.7                      | 369     | 0                                  |
| MA4305            | cell surface protein            | N                           | 741.8                      | 140.2   | 1                                  |
| MA4309            | cell surface protein            | N                           | 409.2                      | 282.2   | 1                                  |
| MA4312            | cell surface protein            | N                           | 89.3                       | 21.5    | 1                                  |
| MA4315            | cell surface protein            | N                           | 1227.9                     | 668.6   | 1                                  |
| MA4363            | cell surface protein            | N                           | 267.4                      | 47.2    | 1                                  |
| MA4478            | cell surface protein            | N                           | 3091                       | 610.1   | 0                                  |
| MA4481            | cell surface protein            | N                           | 481.7                      | 52      | 1                                  |
| MA4577            | cell surface protein            | N                           | 276.9                      | 97.8    | 2                                  |
| MA4588            | cell surface protein            | N                           | 264.9                      | 82.6    | 1                                  |
| MA4589            | cell surface protein            | N                           | 514.2                      | 258.6   | 1                                  |

<sup>a</sup>Gene annotations are from the original genome annotation file [2] <sup>b</sup>Data from [17]. <sup>c</sup>Microarray data [17] from (see Methods and Materials). <sup>d</sup>Predicted trans-membrane domain (TM ) from the genome annotation using TMHMM [18]. N, not detected; Y, detected; NA, data not articulated.
